# Supplementary material for: Bilayer Forming Phospholipids as Targets for Cancer Therapy
Source: MDPI journal article supplement (doi:10.3390/ijms23095266), 2022-05-09
Supplement: s1 [file s1]

**Table S1.** Primers used for PCR experiments.

| Gene                                        | Forward                                 | Reverse                                 | Product length (bp) |
|---------------------------------------------|-----------------------------------------|-----------------------------------------|---------------------|
| <i>PCYT2-201</i>                            | GCACAGTGGAGAGGCCGG                      | TGGAGCCAGGCGCTGGGT                      | 273                 |
| <i>PCYT2-202 (PCYT2<math>\alpha</math>)</i> | GGAGATGTCCTCTGAG-<br>TACCG              | GGCACCAGCCACATA-<br>GATGAC              | 226                 |
| <i>PCYT2-203 (PCYT2<math>\beta</math>)</i>  | Same as <i>PCYT2<math>\alpha</math></i> | Same as <i>PCYT2<math>\alpha</math></i> | 172                 |
| <i>PCYT2-205</i>                            | GCTATGACATGGTG-<br>CATTACG              | CTCCCAGCCTGCTTTACTTC                    | 313                 |
| <i>PCYT2-207</i>                            | Same as <i>PCYT2-205</i>                | GGTAGTTCTTCCCCTT-<br>GTAGTG             | 876                 |
| <i>PCYT2-208</i>                            | AGTCTCCGGGCTGAGCTA                      | CTTGAAGTGACTTAG-<br>GAGCTC              | 180                 |
| <i>PCYT2-209</i>                            | AGATCTGGAGCCACGGCC                      | CCATTTGATGGCCTGCAC                      | 229                 |
| <i>PCYT2-210</i>                            | GTTCTGGGTGGCGTCCTC                      | CAGTGGTGGGGAGCAGGT                      | 400                 |
| <i>PCYT2-211</i>                            | GAGGTCAATCAC-<br>TACAAGGGG              | CTCCTTGGCTTCCTTCTTCTG                   | 732                 |
| <i>PCYT2-212</i>                            | CAAAGCCCATCACAGCAG                      | GTATGGGTCGGAGCCATC                      | 418                 |
| <i>PCYT2-213 (PCYT2<math>\gamma</math>)</i> | Same as <i>PCYT2<math>\alpha</math></i> | Same as <i>PCYT2<math>\alpha</math></i> | 416                 |
| <i>PCYT2-214</i>                            | GTACAGAGAATGCAAGCGC                     | CTTGAAGTGACTTAG-<br>GAGCTC              | 457                 |
| <i>PCYT2-216</i>                            | GTCACTGCCTTCTTGCTC                      | CCTCATGGGAAGAAGTCG                      | 215                 |
| <i>PCYT2-217</i>                            | CACCTCGTTCCCTCTGTTC                     | CTCTGAGCAGCTTTGCTGG                     | 667                 |
| <i>GAPDH</i>                                | CTTCAAGGTGAGGCTCC                       | TTCTCTTGGGCTCCTGGT                      | 450                 |
